# Supplementary material for: From Molecular Genetics to Phylodynamics: Evolutionary Relevance of Mutation Rates Across Viruses
Source: PubMed Central journal article supplement (PMC3342999; doi:10.1371/journal.ppat.1002685), 2012-05-03
Supplement: ppat.1002685.s001.pdf [file ppat.1002685.s001.pdf]

**Table S1: evolution rate dataset**

| Group    | Family          | Virus                                               | $G^*$ | Evolution rate ( $K$ ) <sup>†</sup>                                                                    | Time_span | Ref. |
|----------|-----------------|-----------------------------------------------------|-------|--------------------------------------------------------------------------------------------------------|-----------|------|
| ss(+)RNA | Arteriviridae   | Porcine reproductive and respiratory syndrome virus | 15428 | 1.80E-03                                                                                               | 2         | [1]  |
| ss(+)RNA | Calciviridae    | Norwalk virus                                       | 7654  | 4.97E-03<br>(4.30E-03, 5.60E-03, 5.10E-03)                                                             | 34        | [2]  |
| ss(+)RNA | Calciviridae    | Norwalk virus                                       | 7654  | 5.63E-03<br>(4.16E-03, 7.39E-03, 5.80E-03)                                                             | 31        | [3]  |
| ss(+)RNA | Calciviridae    | Rabbit hemorrhagic disease virus                    | 7437  | 7.70E-04                                                                                               | 53        | [4]  |
| ss(+)RNA | Coronaviridae   | Avian coronavirus                                   | 27608 | 9.40E-04                                                                                               | 13        | [5]  |
| ss(+)RNA | Coronaviridae   | Avian coronavirus                                   | 27608 | 1.70E-04                                                                                               | 25        | [5]  |
| ss(+)RNA | Coronaviridae   | Avian coronavirus                                   | 27608 | 2.40E-04                                                                                               | 41        | [5]  |
| ss(+)RNA | Coronaviridae   | Bovine coronavirus                                  | 31028 | 5.37E-04                                                                                               | 33        | [6]  |
| ss(+)RNA | Coronaviridae   | Human coronavirus 229E                              | 27317 | 3.28E-04                                                                                               | 33        | [7]  |
| ss(+)RNA | Coronaviridae   | SARS coronavirus                                    | 29749 | 2.79E-03                                                                                               | 2         | [8]  |
| ss(+)RNA | Coronaviridae   | SARS coronavirus                                    | 29749 | 2.82E-03                                                                                               | 4         | [9]  |
| ss(+)RNA | Dicistroviridae | Taura syndrome virus                                | 10205 | 2.37E-03                                                                                               | 16        | [10] |
| ss(+)RNA | Flaviviridae    | Dengue virus                                        | 10735 | 6.50E-04                                                                                               | 43        | [11] |
| ss(+)RNA | Flaviviridae    | Dengue virus                                        | 10735 | 1.07E-03                                                                                               | 26        | [12] |
| ss(+)RNA | Flaviviridae    | Dengue virus                                        | 10735 | 6.50E-04                                                                                               | 51        | [13] |
| ss(+)RNA | Flaviviridae    | Dengue virus                                        | 10735 | 8.48E-04                                                                                               | 7         | [14] |
| ss(+)RNA | Flaviviridae    | GB-C virus                                          | 9392  | 3.42E-03<br>(4.13E-03, 4.15E-03, 2.10E-03, 4.45E-03, 4.13E-03, 2.09E-03, 5.03E-03, 4.99E-03, 1.85E-03) | 9         | [15] |
| ss(+)RNA | Flaviviridae    | GB-C virus                                          | 9392  | 3.50E-02<br>(5.43E-02, 4.33E-02, 3.28E-02, 1.94E-02, 3.95E-02, 3.95E-02, 2.49E-02, 4.30E-02, 3.16E-02) | 4         | [15] |
| ss(+)RNA | Flaviviridae    | GB-C virus                                          | 9392  | 9.33E-03<br>(2.19E-02, 1.46E-02, 3.53E-03, 2.74E-02, 7.92E-03, 2.61E-03, 2.89E-02, 8.67E-03, 3.34E-03) | 3         | [15] |
| ss(+)RNA | Flaviviridae    | GB-C virus                                          | 9392  | 1.65E-02<br>(3.55E-02, 2.12E-02, 1.52E-02, 3.58E-02, 8.49E-03, 6.99E-03, 3.24E-02, 1.14E-02, 1.02E-02) | 4         | [15] |
| ss(+)RNA | Flaviviridae    | Hepatitis C virus                                   | 9628  | 1.39E-03                                                                                               | 19        | [16] |
| ss(+)RNA | Flaviviridae    | Hepatitis C virus                                   | 9628  | 1.15E-03                                                                                               | 19        | [16] |
| ss(+)RNA | Flaviviridae    | Hepatitis C virus                                   | 9628  | 1.30E-03                                                                                               | 30        | [17] |
| ss(+)RNA | Flaviviridae    | Hepatitis C virus                                   | 9628  | 1.00E-03                                                                                               | 30        | [17] |
| ss(+)RNA | Flaviviridae    | Hepatitis C virus                                   | 9628  | 2.10E-03                                                                                               | 17        | [17] |
| ss(+)RNA | Flaviviridae    | Hepatitis C virus                                   | 9628  | 1.20E-03                                                                                               | 17        | [17] |
| ss(+)RNA | Flaviviridae    | Japanese encephalitis virus                         | 10976 | 3.03E-04                                                                                               | 74        | [18] |
| ss(+)RNA | Flaviviridae    | Japanese encephalitis virus                         | 10976 | 6.03E-04                                                                                               | 74        | [18] |
| ss(+)RNA | Flaviviridae    | Kyasanur forest disease virus                       | 10685 | 6.40E-04                                                                                               | 49        | [19] |
| ss(+)RNA | Flaviviridae    | St. Louis encephalitis virus                        | 10940 | 2.17E-04                                                                                               | 78        | [20] |
| ss(+)RNA | Flaviviridae    | St. Louis encephalitis virus                        | 10940 | 4.10E-04                                                                                               | 72        | [21] |
| ss(+)RNA | Flaviviridae    | West Nile virus                                     | 11029 | 8.50E-04                                                                                               | 8         | [22] |
| ss(+)RNA | Luteoviridae    | Barley yellow dwarf virus                           | 5700  | 6.70E-03                                                                                               | 89        | [23] |

|          |                |                                    |      |          |    |      |
|----------|----------------|------------------------------------|------|----------|----|------|
| ss(+)RNA | Luteoviridae   | Barley yellow dwarf virus          | 5700 | 1.50E-03 | 89 | [23] |
| ss(+)RNA | Luteoviridae   | Barley yellow dwarf virus          | 5700 | 6.00E-04 | 89 | [23] |
| ss(+)RNA | Luteoviridae   | Barley yellow dwarf virus          | 5700 | 3.16E-04 | 2  | [24] |
| ss(+)RNA | Luteoviridae   | Beet chlorosis virus               | 5776 | 7.20E-03 | 20 | [23] |
| ss(+)RNA | Luteoviridae   | Beet chlorosis virus               | 5776 | 1.60E-03 | 20 | [23] |
| ss(+)RNA | Luteoviridae   | Beet chlorosis virus               | 5776 | 2.70E-03 | 20 | [23] |
| ss(+)RNA | Luteoviridae   | Beet mild yellowing virus          | 5722 | 7.70E-04 | 25 | [23] |
| ss(+)RNA | Luteoviridae   | Beet mild yellowing virus          | 5722 | 3.70E-04 | 25 | [23] |
| ss(+)RNA | Luteoviridae   | Beet mild yellowing virus          | 5722 | 4.90E-05 | 25 | [23] |
| ss(+)RNA | Luteoviridae   | Cereal yellow dwarf-RPV virus      | 5723 | 2.30E-02 | 81 | [23] |
| ss(+)RNA | Luteoviridae   | Cereal yellow dwarf-RPV virus      | 5723 | 7.40E-04 | 81 | [23] |
| ss(+)RNA | Luteoviridae   | Cereal yellow dwarf-RPV virus      | 5723 | 3.30E-03 | 81 | [23] |
| ss(+)RNA | Luteoviridae   | Cucurbit aphid-borne yellows virus | 5669 | 4.30E-03 | 5  | [23] |
| ss(+)RNA | Luteoviridae   | Cucurbit aphid-borne yellows virus | 5669 | 3.50E-02 | 5  | [23] |
| ss(+)RNA | Luteoviridae   | Potato leafroll virus              | 5987 | 3.40E-04 | 34 | [23] |
| ss(+)RNA | Luteoviridae   | Potato leafroll virus              | 5987 | 5.90E-05 | 34 | [23] |
| ss(+)RNA | Luteoviridae   | Potato leafroll virus              | 5987 | 6.20E-04 | 34 | [23] |
| ss(+)RNA | Luteoviridae   | Potato leafroll virus              | 5987 | 2.90E-04 | 34 | [23] |
| ss(+)RNA | Luteoviridae   | Soybean dwarf virus                | 5853 | 2.60E-03 | 17 | [23] |
| ss(+)RNA | Luteoviridae   | Soybean dwarf virus                | 5853 | 6.00E-04 | 17 | [23] |
| ss(+)RNA | Luteoviridae   | Soybean dwarf virus                | 5853 | 2.30E-03 | 17 | [23] |
| ss(+)RNA | Luteoviridae   | Sugarcane yellow leaf virus        | 5899 | 1.20E-03 | 19 | [23] |
| ss(+)RNA | Luteoviridae   | Sugarcane yellow leaf virus        | 5899 | 1.40E-04 | 19 | [23] |
| ss(+)RNA | Luteoviridae   | Sugarcane yellow leaf virus        | 5899 | 1.10E-03 | 19 | [23] |
| ss(+)RNA | Luteoviridae   | Sugarcane yellow leaf virus        | 5899 | 3.70E-05 | 19 | [23] |
| ss(+)RNA | Luteoviridae   | Turnip yellows virus               | 5641 | 2.70E-03 | 26 | [23] |
| ss(+)RNA | Luteoviridae   | Turnip yellows virus               | 5641 | 1.00E-03 | 26 | [23] |
| ss(+)RNA | Luteoviridae   | Turnip yellows virus               | 5641 | 8.60E-04 | 26 | [23] |
| ss(+)RNA | Picornaviridae | Encephalomyocarditis virus         | 7835 | 1.61E-03 | 22 | [25] |
| ss(+)RNA | Picornaviridae | Foot-and-mouth disease virus       | 8170 | 1.45E-03 | 38 | [25] |
| ss(+)RNA | Picornaviridae | Foot-and-mouth disease virus       | 8170 | 1.46E-03 | 76 | [26] |
| ss(+)RNA | Picornaviridae | Hepatitis A virus                  | 7478 | 9.76E-04 | 17 | [27] |
| ss(+)RNA | Picornaviridae | Hepatitis A virus                  | 7478 | 8.90E-04 | 32 | [25] |
| ss(+)RNA | Picornaviridae | Hepatitis A virus                  | 7478 | 1.73E-04 | 33 | [28] |
| ss(+)RNA | Picornaviridae | Human enterovirus A                | 7400 | 5.53E-03 | 24 | [25] |
| ss(+)RNA | Picornaviridae | Human enterovirus A                | 7400 | 8.65E-03 | 59 | [29] |
| ss(+)RNA | Picornaviridae | Human enterovirus A                | 7400 | 3.66E-03 | 29 | [30] |
| ss(+)RNA | Picornaviridae | Human enterovirus A                | 7400 | 3.19E-03 | 62 | [30] |
| ss(+)RNA | Picornaviridae | Human enterovirus B                | 7389 | 5.27E-03 | 62 | [25] |
| ss(+)RNA | Picornaviridae | Human enterovirus B                | 7389 | 5.73E-03 | 48 | [25] |
| ss(+)RNA | Picornaviridae | Human enterovirus B                | 7389 | 8.80E-03 | 49 | [31] |
| ss(+)RNA | Picornaviridae | Human enterovirus B                | 7389 | 4.20E-03 | 26 | [32] |
| ss(+)RNA | Picornaviridae | Human parechovirus                 | 7348 | 2.96E-03 | 34 | [25] |
| ss(+)RNA | Picornaviridae | Human parechovirus                 | 7348 | 2.21E-03 | 51 | [33] |
| ss(+)RNA | Picornaviridae | Human parechovirus                 | 7348 | 2.79E-03 | 32 | [33] |
| ss(+)RNA | Picornaviridae | Poliovirus 1                       | 7440 | 1.17E-02 | 24 | [25] |

|          |                  |                                       |       |                                                                   |     |      |
|----------|------------------|---------------------------------------|-------|-------------------------------------------------------------------|-----|------|
| ss(+)RNA | Picornaviridae   | Poliovirus 2                          | 7440  | 1.01E-02                                                          | 10  | [34] |
| ss(+)RNA | Picornaviridae   | Porcine teschovirus                   | 7117  | 1.62E-03                                                          | 50  | [25] |
| ss(+)RNA | Potyviridae      | Zucchini yellow mosaic virus          | 9591  | 5.00E-04                                                          | 22  | [35] |
| ss(+)RNA | Togaviridae      | Fort Morgan virus                     | 11381 | 2.64E-04                                                          | 32  | [36] |
| ss(+)RNA | Togaviridae      | Fort Morgan virus                     | 11381 | 1.81E-04                                                          | 9   | [36] |
| ss(+)RNA | Togaviridae      | Ross River virus                      | 11657 | 7.53E-04<br>(8.13E-04, 8.55E-04, 6.91E-04,<br>7.45E-04, 6.78E-04) | 45  | [37] |
| ss(+)RNA | Togaviridae      | Venezuelan equine encephalitis virus  | 11444 | 1.28E-04                                                          | 54  | [38] |
| ss(+)RNA | Virgaviridae     | Cucumber green mottle mosaic virus    | 6424  | 5.40E-05                                                          | 38  | [39] |
| ss(+)RNA | Virgaviridae     | Cucumber green mottle mosaic virus    | 6424  | 6.70E-04                                                          | 38  | [39] |
| ss(+)RNA | Virgaviridae     | Cucumber green mottle mosaic virus    | 6424  | 8.00E-04                                                          | 38  | [39] |
| ss(+)RNA | Virgaviridae     | Odontoglossum ringspot virus          | 6618  | 7.70E-04                                                          | 44  | [39] |
| ss(+)RNA | Virgaviridae     | Odontoglossum ringspot virus          | 6618  | 1.30E-03                                                          | 44  | [39] |
| ss(+)RNA | Virgaviridae     | Odontoglossum ringspot virus          | 6618  | 7.80E-04                                                          | 44  | [39] |
| ss(+)RNA | Virgaviridae     | Pepper mild mottle virus              | 6357  | 2.60E-04                                                          | 36  | [39] |
| ss(+)RNA | Virgaviridae     | Pepper mild mottle virus              | 6357  | 8.90E-04                                                          | 36  | [39] |
| ss(+)RNA | Virgaviridae     | Pepper mild mottle virus              | 6357  | 1.80E-04                                                          | 36  | [39] |
| ss(+)RNA | Virgaviridae     | Ribgrass mosaic virus                 | 6301  | 1.40E-04                                                          | 51  | [39] |
| ss(+)RNA | Virgaviridae     | Tobacco mild green mosaic virus       | 6355  | 1.30E-04                                                          | 101 | [39] |
| ss(+)RNA | Virgaviridae     | Tobacco mild green mosaic virus       | 6355  | 1.70E-04                                                          | 101 | [39] |
| ss(+)RNA | Virgaviridae     | Tobacco mosaic virus                  | 6395  | 2.90E-04                                                          | 109 | [39] |
| ss(+)RNA | Virgaviridae     | Tobacco mosaic virus                  | 6395  | 2.90E-04                                                          | 109 | [39] |
| ss(+)RNA | Virgaviridae     | Tobacco mosaic virus                  | 6395  | 1.60E-04                                                          | 109 | [39] |
| ss(+)RNA | Virgaviridae     | Tomato mosaic virus                   | 6383  | 2.10E-04                                                          | 38  | [39] |
| ss(+)RNA | none             | Rice yellow mottle virus              | 4450  | 7.50E-04<br>(7.70E-04, 7.30E-04)                                  | 40  | [40] |
| ss(-)RNA | Bunyaviridae     | Crimean-Congo hemorrhagic fever virus | 19146 | 1.09E-04                                                          | 49  | [41] |
| ss(-)RNA | Bunyaviridae     | Crimean-Congo hemorrhagic fever virus | 19146 | 1.52E-04                                                          | 47  | [41] |
| ss(-)RNA | Bunyaviridae     | Crimean-Congo hemorrhagic fever virus | 19146 | 5.80E-05                                                          | 47  | [41] |
| ss(-)RNA | Bunyaviridae     | Hantaviruses virus                    | 12305 | 6.76E-04                                                          | 23  | [42] |
| ss(-)RNA | Bunyaviridae     | Rift valley fever virus               | 11979 | 2.35E-04                                                          | 56  | [43] |
| ss(-)RNA | Bunyaviridae     | Rift valley fever virus               | 11979 | 2.42E-04                                                          | 56  | [43] |
| ss(-)RNA | Bunyaviridae     | Rift valley fever virus               | 11979 | 2.78E-04                                                          | 56  | [43] |
| ss(-)RNA | Bunyaviridae     | Sin Nombre virus                      | 12317 | 6.76E-03                                                          | 12  | [44] |
| ss(-)RNA | Bunyaviridae     | Sin Nombre virus                      | 12317 | 1.93E-03                                                          | 12  | [44] |
| ss(-)RNA | Orthomyxoviridae | Influenza A virus                     | 13588 | 3.15E-03                                                          | 49  | [45] |
| ss(-)RNA | Orthomyxoviridae | Influenza A virus                     | 13588 | 2.86E-03                                                          | 47  | [45] |
| ss(-)RNA | Orthomyxoviridae | Influenza A virus                     | 13588 | 3.48E-03                                                          | 47  | [45] |
| ss(-)RNA | Orthomyxoviridae | Influenza A virus                     | 13588 | 3.92E-03                                                          | 70  | [45] |
| ss(-)RNA | Orthomyxoviridae | Influenza A virus                     | 13588 | 3.17E-03                                                          | 49  | [45] |
| ss(-)RNA | Orthomyxoviridae | Influenza A virus                     | 13588 | 3.61E-03                                                          | 46  | [45] |

|          |                  |                                 |       |                                            |    |      |
|----------|------------------|---------------------------------|-------|--------------------------------------------|----|------|
| ss(-)RNA | Orthomyxoviridae | Influenza A virus               | 13588 | 2.49E-03                                   | 49 | [45] |
| ss(-)RNA | Orthomyxoviridae | Influenza A virus               | 13588 | 3.87E-03                                   | 47 | [45] |
| ss(-)RNA | Orthomyxoviridae | Influenza A virus               | 13588 | 3.28E-03                                   | 74 | [46] |
| ss(-)RNA | Orthomyxoviridae | Influenza A virus               | 13588 | 1.82E-03                                   | 23 | [46] |
| ss(-)RNA | Orthomyxoviridae | Influenza A virus               | 13588 | 2.11E-03                                   | 39 | [46] |
| ss(-)RNA | Orthomyxoviridae | Influenza A virus               | 13588 | 3.12E-03                                   | 29 | [46] |
| ss(-)RNA | Orthomyxoviridae | Influenza A virus               | 13588 | 3.20E-03                                   | 72 | [46] |
| ss(-)RNA | Orthomyxoviridae | Influenza A virus               | 13588 | 4.31E-03                                   | 11 | [46] |
| ss(-)RNA | Orthomyxoviridae | Influenza A virus               | 13588 | 7.84E-03                                   | 1  | [47] |
| ss(-)RNA | Orthomyxoviridae | Influenza A virus               | 13588 | 1.98E-03                                   | 91 | [48] |
| ss(-)RNA | Orthomyxoviridae | Influenza A virus               | 13588 | 3.43E-03                                   | 2  | [48] |
| ss(-)RNA | Orthomyxoviridae | Influenza A virus               | 13588 | 2.29E-03                                   | 79 | [48] |
| ss(-)RNA | Orthomyxoviridae | Influenza A virus               | 13588 | 3.41E-03                                   | 82 | [48] |
| ss(-)RNA | Orthomyxoviridae | Influenza A virus               | 13588 | 2.80E-03                                   | 30 | [48] |
| ss(-)RNA | Orthomyxoviridae | Influenza A virus               | 13588 | 2.25E-03                                   | 55 | [48] |
| ss(-)RNA | Orthomyxoviridae | Influenza A virus               | 13588 | 9.00E-04                                   | 45 | [48] |
| ss(-)RNA | Paramyxoviridae  | Avian metapneumovirus           | 14071 | 4.47E-03                                   | 9  | [49] |
| ss(-)RNA | Paramyxoviridae  | Avian metapneumovirus           | 14071 | 7.01E-03                                   | 9  | [49] |
| ss(-)RNA | Paramyxoviridae  | Avian metapneumovirus           | 14071 | 1.39E-03                                   | 9  | [49] |
| ss(-)RNA | Paramyxoviridae  | Avian metapneumovirus           | 14071 | 6.14E-03                                   | 9  | [49] |
| ss(-)RNA | Paramyxoviridae  | Canine distemper virus          | 15690 | 1.17E-03                                   | 19 | [50] |
| ss(-)RNA | Paramyxoviridae  | Human parainfluenza virus       | 13335 | 7.12E-04                                   | 25 | [51] |
| ss(-)RNA | Paramyxoviridae  | Measles virus                   | 15894 | 6.02E-04                                   | 55 | [52] |
| ss(-)RNA | Paramyxoviridae  | Measles virus                   | 15894 | 6.44E-04                                   | 55 | [52] |
| ss(-)RNA | Paramyxoviridae  | Measles virus                   | 15894 | 6.58E-04                                   | 29 | [50] |
| ss(-)RNA | Paramyxoviridae  | Measles virus                   | 15894 | 8.69E-04                                   | 26 | [50] |
| ss(-)RNA | Paramyxoviridae  | Mumps virus                     | 15384 | 9.17E-04                                   | 54 | [50] |
| ss(-)RNA | Paramyxoviridae  | Respiratory syncytial virus     | 15191 | 2.31E-03                                   | 10 | [53] |
| ss(-)RNA | Rhabdoviridae    | European bat lyssavirus         | 12000 | 5.10E-05                                   | 35 | [54] |
| ss(-)RNA | Rhabdoviridae    | European bat lyssavirus         | 12000 | 6.11E-05                                   | 35 | [54] |
| ss(-)RNA | Rhabdoviridae    | Rabies virus                    | 11932 | 3.32E-04                                   | 30 | [55] |
| ss(-)RNA | Rhabdoviridae    | Rabies virus                    | 11932 | 2.57E-04                                   | 30 | [55] |
| ss(-)RNA | Rhabdoviridae    | Rabies virus                    | 11932 | 3.57E-04                                   | 30 | [55] |
| ss(-)RNA | Rhabdoviridae    | Rabies virus                    | 11932 | 2.75E-04                                   | 30 | [55] |
| ss(-)RNA | Rhabdoviridae    | Rabies virus                    | 11932 | 3.90E-04                                   | 30 | [55] |
| ss(-)RNA | Rhabdoviridae    | Rabies virus                    | 11932 | 2.59E-04                                   | 30 | [55] |
| ss(-)RNA | Rhabdoviridae    | Rabies virus                    | 11932 | 1.38E-03                                   | 14 | [56] |
| ss(-)RNA | Rhabdoviridae    | Rabies virus                    | 11932 | 2.32E-04                                   | 8  | [56] |
| ss(-)RNA | Rhabdoviridae    | Rabies virus                    | 11932 | 2.70E-04                                   | 33 | [57] |
| ss(-)RNA | Rhabdoviridae    | Rabies virus                    | 11932 | 1.68E-03                                   | 13 | [58] |
| ss(-)RNA | Rhabdoviridae    | Rabies virus                    | 11932 | 8.26E-04                                   | 20 | [58] |
| ss(-)RNA | Rhabdoviridae    | Rabies virus                    | 11932 | 1.53E-04                                   | 40 | [59] |
| ss(-)RNA | Rhabdoviridae    | Rabies virus                    | 11932 | 3.96E-04                                   | 39 | [60] |
| dsRNA    | Birnaviridae     | Infectious bursal disease virus | 5898  | 6.36E-04<br>(6.40E-04, 6.00E-04, 6.70E-04) | 12 | [61] |
| dsRNA    | Reoviridae       | Bluetongue virus                | 19186 | 3.71E-04<br>(2.79E-04, 4.94E-04)           | 45 | [62] |
| dsRNA    | Reoviridae       | Bluetongue virus                | 19186 | 1.79E-04<br>(1.68E-04, 1.90E-04)           | 44 | [62] |
| dsRNA    | Reoviridae       | Bluetongue virus                | 19186 | 5.37E-05<br>(5.52E-05, 5.22E-05)           | 37 | [62] |
| dsRNA    | Reoviridae       | Bluetongue virus                | 19186 | 5.39E-04                                   | 28 | [62] |

|       |                |                               |       |                                            |    |      |
|-------|----------------|-------------------------------|-------|--------------------------------------------|----|------|
|       |                |                               |       | (4.19E-04, 6.94E-04)                       |    |      |
| dsRNA | Reoviridae     | Homalodisca vitripennis virus | 25724 | 3.46E-05<br>(5.42E-05, 3.30E-05, 2.32E-05) | 6  | [63] |
| dsRNA | Reoviridae     | Human rotavirus A             | 18555 | 1.87E-03                                   | 29 | [64] |
| dsRNA | Reoviridae     | Human rotavirus A             | 18555 | 1.66E-03                                   | 21 | [64] |
| dsRNA | Reoviridae     | Liao ning virus               | 20739 | 1.99E-03                                   | 2  | [65] |
| RT    | Hepadnaviridae | Avian hepatitis B virus       | 3027  | 7.32E-04                                   | 16 | [66] |
| RT    | Hepadnaviridae | Human hepatitis B virus       | 3215  | 7.19E-04<br>(6.01E-04, 8.60E-04)           | 30 | [67] |
| RT    | Hepadnaviridae | Human hepatitis B virus       | 3215  | 1.57E-04<br>(1.23E-04, 2.00E-04)           | 30 | [67] |
| RT    | Hepadnaviridae | Human hepatitis B virus       | 3215  | 1.11E-04<br>(1.01E-04, 1.21E-04)           | 30 | [67] |
| RT    | Hepadnaviridae | Human hepatitis B virus       | 3215  | 4.25E-04<br>(1.94E-04, 9.29E-04)           | 30 | [67] |
| RT    | Hepadnaviridae | Human hepatitis B virus       | 3215  | 7.66E-04<br>(5.29E-04, 1.11E-03)           | 30 | [67] |
| RT    | Hepadnaviridae | Human hepatitis B virus       | 3215  | 1.12E-04<br>(4.39E-05, 2.88E-04)           | 30 | [67] |
| RT    | Hepadnaviridae | Human hepatitis B virus       | 3215  | 7.72E-04                                   | 23 | [66] |
| RT    | Retroviridae   | HIV-1                         | 9749  | 2.50E-03                                   | 11 | [68] |
| RT    | Retroviridae   | HIV-1                         | 9749  | 1.80E-03                                   | 12 | [68] |
| RT    | Retroviridae   | HIV-1                         | 9749  | 2.06E-03                                   | 15 | [69] |
| RT    | Retroviridae   | HIV-1                         | 9749  | 1.89E-03                                   | 2  | [70] |
| RT    | Retroviridae   | HIV-1                         | 9749  | 1.55E-03                                   | 2  | [70] |
| RT    | Retroviridae   | HIV-1                         | 9749  | 1.42E-03                                   | 2  | [70] |
| RT    | Retroviridae   | HIV-1                         | 9749  | 1.55E-03                                   | 2  | [70] |
| RT    | Retroviridae   | HIV-1                         | 9749  | 1.13E-03                                   | 2  | [70] |
| RT    | Retroviridae   | HIV-1                         | 9749  | 2.41E-03                                   | 2  | [70] |
| RT    | Retroviridae   | HIV-1                         | 9749  | 2.56E-03                                   | 2  | [70] |
| RT    | Retroviridae   | HIV-1                         | 9749  | 3.63E-03                                   | 2  | [70] |
| RT    | Retroviridae   | HIV-1                         | 9749  | 2.46E-03                                   | 2  | [70] |
| RT    | Retroviridae   | HIV-1                         | 9749  | 2.55E-03                                   | 2  | [70] |
| RT    | Retroviridae   | HIV-1                         | 9749  | 1.08E-02                                   | 7  | [71] |
| ssDNA | Circoviridae   | Porcine circovirus 2          | 1768  | 1.15E-03                                   | 9  | [72] |
| ssDNA | Circoviridae   | Porcine circovirus 2          | 1768  | 1.64E-03                                   | 25 | [72] |
| ssDNA | Geminiviridae  | African cassava mosaic virus  | 5503  | 1.60E-03                                   | 7  | [73] |
| ssDNA | Geminiviridae  | African cassava mosaic virus  | 5503  | 1.33E-04                                   | 7  | [73] |
| ssDNA | Geminiviridae  | African cassava mosaic virus  | 5503  | 1.56E-03                                   | 7  | [74] |
| ssDNA | Geminiviridae  | Maize streak virus            | 2690  | 3.87E-04                                   | 29 | [74] |
| ssDNA | Geminiviridae  | Tomato yellow leaf curl virus | 2781  | 2.88E-04                                   | 18 | [75] |
| ssDNA | Geminiviridae  | Tomato yellow leaf curl virus | 2781  | 4.04E-04                                   | 18 | [74] |
| ssDNA | Nanoviridae    | Banana bunchy top virus       | 6396  | 1.43E-04                                   | 16 | [76] |
| ssDNA | Parvoviridae   | Canine parvovirus             | 5323  | 1.70E-04                                   | 26 | [77] |
| ssDNA | Parvoviridae   | Canine parvovirus             | 5323  | 7.90E-05                                   | 26 | [77] |
| ssDNA | Parvoviridae   | Feline panleukopenia virus    | 5323  | 9.40E-05                                   | 34 | [77] |
| ssDNA | Parvoviridae   | Feline panleukopenia virus    | 5323  | 7.90E-05                                   | 28 | [77] |
| ssDNA | Parvoviridae   | Human parvovirus B19          | 5594  | 1.14E-04                                   | 28 | [78] |
| ssDNA | Parvoviridae   | Human parvovirus B19          | 5594  | 1.83E-04                                   | 28 | [78] |

|       |                  |                                                        |        |          |    |      |
|-------|------------------|--------------------------------------------------------|--------|----------|----|------|
| ssDNA | Parvoviridae     | Human parvovirus B19                                   | 5594   | 1.20E-04 | 14 | [79] |
| ssDNA | Parvoviridae     | Human parvovirus B19                                   | 5594   | 2.30E-04 | 14 | [79] |
| ssDNA | Parvoviridae     | Infectious hypodermal and hematopoietic necrosis virus | 3909   | 1.39E-04 | 21 | [80] |
| ssDNA | Parvoviridae     | Porcine parvovirus                                     | 5075   | 3.02E-04 | 33 | [81] |
| ssDNA | Parvoviridae     | Porcine parvovirus                                     | 5075   | 4.04E-04 | 33 | [81] |
| ssDNA | Parvoviridae     | Porcine parvovirus                                     | 5075   | 5.39E-05 | 33 | [81] |
| dsDNA | Adenoviridae     | Human adenovirus B                                     | 35343  | 7.20E-05 | 24 | [82] |
| dsDNA | Adenoviridae     | Human adenovirus C                                     | 35937  | 3.46E-05 | 21 | [82] |
| dsDNA | Herpesviridae    | Herpes simplex virus 1                                 | 152261 | 8.21E-05 | 27 | [82] |
| dsDNA | Herpesviridae    | Varicella zoster virus                                 | 124884 | 6.26E-06 | 37 | [82] |
| dsDNA | Papillomaviridae | Human papillomavirus16                                 | 7905   | 3.94E-03 | 3  | [82] |
| dsDNA | Polyomaviridae   | BK polyomavirus                                        | 5153   | 4.34E-05 | 29 | [82] |
| dsDNA | Polyomaviridae   | JC polyomavirus                                        | 5130   | 1.70E-05 | 33 | [83] |
| dsDNA | Poxviridae       | Monkeypox virus                                        | 196858 | 7.00E-07 | 26 | [84] |
| dsDNA | Poxviridae       | Variola virus                                          | 185578 | 9.32E-06 | 31 | [82] |

\*Genome size

†Values directly taken from the original study. When several estimates obtained by different methods were available for the same dataset and no best-fit value was provided, the geometric mean was used and original values are indicated in parentheses.

**Table S2: Fitness effects of point mutations determined by site-directed mutagenesis**

| Virus                      | Site | $q^*$ | Deleterious | Lethal | $B^\dagger$<br>(upper) | $s^\ddagger$<br>(upper) | $B$<br>(lower) | $s$<br>(lower) | Ref. |
|----------------------------|------|-------|-------------|--------|------------------------|-------------------------|----------------|----------------|------|
| Bacteriophage Q $\beta$    | 161  | 0.993 | 1           | 0      | 4000                   | 0.054                   | 400            | 0.039          | [85] |
| Bacteriophage Q $\beta$    | 328  | 1.003 | 0           | 0      | 4000                   |                         | 400            |                | [85] |
| Bacteriophage Q $\beta$    | 665  | 0.560 | 1           | 0      | 4000                   | 0.974                   | 400            | 0.931          | [85] |
| Bacteriophage Q $\beta$    | 733  | 0.000 | 1           | 1      | 4000                   | 1.000                   | 400            | 1.000          | [85] |
| Bacteriophage Q $\beta$    | 772  | 0.635 | 1           | 0      | 4000                   | 0.952                   | 400            | 0.890          | [85] |
| Bacteriophage Q $\beta$    | 891  | 0.905 | 1           | 0      | 4000                   | 0.545                   | 400            | 0.435          | [85] |
| Bacteriophage Q $\beta$    | 939  | 0.928 | 1           | 0      | 4000                   | 0.450                   | 400            | 0.351          | [85] |
| Bacteriophage Q $\beta$    | 1096 | 0.974 | 1           | 0      | 4000                   | 0.191                   | 400            | 0.142          | [85] |
| Bacteriophage Q $\beta$    | 1149 | 0.000 | 1           | 1      | 4000                   | 1.000                   | 400            | 1.000          | [85] |
| Bacteriophage Q $\beta$    | 1165 | 0.961 | 1           | 0      | 4000                   | 0.279                   | 400            | 0.211          | [85] |
| Bacteriophage Q $\beta$    | 1283 | 0.000 | 1           | 1      | 4000                   | 1.000                   | 400            | 1.000          | [85] |
| Bacteriophage Q $\beta$    | 1288 | 0.000 | 1           | 1      | 4000                   | 1.000                   | 400            | 1.000          | [85] |
| Bacteriophage Q $\beta$    | 1329 | 0.000 | 1           | 1      | 4000                   | 1.000                   | 400            | 1.000          | [85] |
| Bacteriophage Q $\beta$    | 1442 | 0.000 | 1           | 1      | 4000                   | 1.000                   | 400            | 1.000          | [85] |
| Bacteriophage Q $\beta$    | 1485 | 0.957 | 1           | 0      | 4000                   | 0.303                   | 400            | 0.230          | [85] |
| Bacteriophage Q $\beta$    | 1525 | 1.035 | 0           | 0      | 4000                   |                         | 400            |                | [85] |
| Bacteriophage Q $\beta$    | 1809 | 0.973 | 1           | 0      | 4000                   | 0.201                   | 400            | 0.150          | [85] |
| Bacteriophage Q $\beta$    | 1814 | 0.986 | 1           | 0      | 4000                   | 0.108                   | 400            | 0.080          | [85] |
| Bacteriophage Q $\beta$    | 1895 | 0.941 | 1           | 0      | 4000                   | 0.385                   | 400            | 0.297          | [85] |
| Bacteriophage Q $\beta$    | 2090 | 0.770 | 1           | 0      | 4000                   | 0.852                   | 400            | 0.750          | [85] |
| Bacteriophage Q $\beta$    | 2360 | 0.000 | 1           | 1      | 4000                   | 1.000                   | 400            | 1.000          | [85] |
| Bacteriophage Q $\beta$    | 2379 | 0.000 | 1           | 1      | 4000                   | 1.000                   | 400            | 1.000          | [85] |
| Bacteriophage Q $\beta$    | 2787 | 0.902 | 1           | 0      | 4000                   | 0.558                   | 400            | 0.446          | [85] |
| Bacteriophage Q $\beta$    | 2793 | 0.907 | 1           | 0      | 4000                   | 0.539                   | 400            | 0.430          | [85] |
| Bacteriophage Q $\beta$    | 2797 | 0.919 | 1           | 0      | 4000                   | 0.491                   | 400            | 0.387          | [85] |
| Bacteriophage Q $\beta$    | 3027 | 1.025 | 0           | 0      | 4000                   |                         | 400            |                | [85] |
| Bacteriophage Q $\beta$    | 3075 | 1.000 | 0           | 0      | 4000                   |                         | 400            |                | [85] |
| Bacteriophage Q $\beta$    | 3094 | 1.007 | 0           | 0      | 4000                   |                         | 400            |                | [85] |
| Bacteriophage Q $\beta$    | 3101 | 0.000 | 1           | 1      | 4000                   | 1.000                   | 400            | 1.000          | [85] |
| Bacteriophage Q $\beta$    | 3210 | 0.000 | 1           | 1      | 4000                   | 1.000                   | 400            | 1.000          | [85] |
| Bacteriophage Q $\beta$    | 3213 | 0.953 | 1           | 0      | 4000                   | 0.325                   | 400            | 0.248          | [85] |
| Bacteriophage Q $\beta$    | 3397 | 0.740 | 1           | 0      | 4000                   | 0.884                   | 400            | 0.791          | [85] |
| Bacteriophage Q $\beta$    | 3415 | 0.000 | 1           | 1      | 4000                   | 1.000                   | 400            | 1.000          | [85] |
| Bacteriophage Q $\beta$    | 3452 | 0.671 | 1           | 0      | 4000                   | 0.935                   | 400            | 0.863          | [85] |
| Bacteriophage Q $\beta$    | 3483 | 1.016 | 0           | 0      | 4000                   |                         | 400            |                | [85] |
| Bacteriophage Q $\beta$    | 3661 | 0.777 | 1           | 0      | 4000                   | 0.843                   | 400            | 0.739          | [85] |
| Bacteriophage Q $\beta$    | 3686 | 0.000 | 1           | 1      | 4000                   | 1.000                   | 400            | 1.000          | [85] |
| Bacteriophage Q $\beta$    | 3815 | 1.032 | 0           | 0      | 4000                   |                         | 400            |                | [85] |
| Bacteriophage Q $\beta$    | 3916 | 0.772 | 1           | 0      | 4000                   | 0.849                   | 400            | 0.747          | [85] |
| Bacteriophage Q $\beta$    | 3951 | 0.996 | 1           | 0      | 4000                   | 0.034                   | 400            | 0.025          | [85] |
| Bacteriophage Q $\beta$    | 4066 | 0.931 | 1           | 0      | 4000                   | 0.437                   | 400            | 0.340          | [85] |
| Bacteriophage Q $\beta$    | 4082 | 0.648 | 1           | 0      | 4000                   | 0.946                   | 400            | 0.881          | [85] |
| Vesicular stomatitis virus | 112  | 0.000 | 1           | 1      | 1000                   | 1.000                   | 100            | 1.000          | [86] |
| Vesicular stomatitis virus | 636  | 0.000 | 1           | 1      | 1000                   | 1.000                   | 100            | 1.000          | [86] |
| Vesicular stomatitis virus | 877  | 0.831 | 1           | 0      | 1000                   | 0.690                   | 100            | 0.546          | [86] |
| Vesicular stomatitis virus | 906  | 1.055 | 0           | 0      | 1000                   |                         | 100            |                | [86] |

|                            |       |       |   |   |      |       |     |       |      |
|----------------------------|-------|-------|---|---|------|-------|-----|-------|------|
| Vesicular stomatitis virus | 1044  | 1.002 | 0 | 0 | 1000 |       | 100 |       | [86] |
| Vesicular stomatitis virus | 1073  | 0.265 | 1 | 0 | 1000 | 0.995 | 100 | 0.976 | [86] |
| Vesicular stomatitis virus | 1323  | 0.429 | 1 | 0 | 1000 | 0.982 | 100 | 0.937 | [86] |
| Vesicular stomatitis virus | 1585  | 0.965 | 1 | 0 | 1000 | 0.214 | 100 | 0.150 | [86] |
| Vesicular stomatitis virus | 2018  | 0.961 | 1 | 0 | 1000 | 0.239 | 100 | 0.168 | [86] |
| Vesicular stomatitis virus | 2613  | 1.002 | 0 | 0 | 1000 |       | 100 |       | [86] |
| Vesicular stomatitis virus | 2767  | 0.000 | 1 | 1 | 1000 | 1.000 | 100 | 1.000 | [86] |
| Vesicular stomatitis virus | 2877  | 0.000 | 1 | 1 | 1000 | 1.000 | 100 | 1.000 | [86] |
| Vesicular stomatitis virus | 2969  | 0.988 | 1 | 0 | 1000 | 0.082 | 100 | 0.056 | [86] |
| Vesicular stomatitis virus | 2969  | 0.954 | 1 | 0 | 1000 | 0.275 | 100 | 0.195 | [86] |
| Vesicular stomatitis virus | 3079  | 0.000 | 1 | 1 | 1000 | 1.000 | 100 | 1.000 | [86] |
| Vesicular stomatitis virus | 3192  | 0.571 | 1 | 0 | 1000 | 0.949 | 100 | 0.870 | [86] |
| Vesicular stomatitis virus | 3327  | 0.000 | 1 | 1 | 1000 | 1.000 | 100 | 1.000 | [86] |
| Vesicular stomatitis virus | 3446  | 0.961 | 1 | 0 | 1000 | 0.237 | 100 | 0.167 | [86] |
| Vesicular stomatitis virus | 3615  | 0.877 | 1 | 0 | 1000 | 0.574 | 100 | 0.438 | [86] |
| Vesicular stomatitis virus | 3625  | 0.000 | 1 | 1 | 1000 | 1.000 | 100 | 1.000 | [86] |
| Vesicular stomatitis virus | 3688  | 0.000 | 1 | 1 | 1000 | 1.000 | 100 | 1.000 | [86] |
| Vesicular stomatitis virus | 3950  | 0.916 | 1 | 0 | 1000 | 0.440 | 100 | 0.323 | [86] |
| Vesicular stomatitis virus | 4163  | 0.000 | 1 | 1 | 1000 | 1.000 | 100 | 1.000 | [86] |
| Vesicular stomatitis virus | 4175  | 1.020 | 0 | 0 | 1000 |       | 100 |       | [86] |
| Vesicular stomatitis virus | 4398  | 0.875 | 1 | 0 | 1000 | 0.580 | 100 | 0.443 | [86] |
| Vesicular stomatitis virus | 4459  | 0.732 | 1 | 0 | 1000 | 0.844 | 100 | 0.716 | [86] |
| Vesicular stomatitis virus | 4824  | 0.000 | 1 | 1 | 1000 | 1.000 | 100 | 1.000 | [86] |
| Vesicular stomatitis virus | 4984  | 1.018 | 0 | 0 | 1000 |       | 100 |       | [86] |
| Vesicular stomatitis virus | 5124  | 0.774 | 1 | 0 | 1000 | 0.790 | 100 | 0.653 | [86] |
| Vesicular stomatitis virus | 5496  | 1.005 | 0 | 0 | 1000 |       | 100 |       | [86] |
| Vesicular stomatitis virus | 5597  | 1.030 | 0 | 0 | 1000 |       | 100 |       | [86] |
| Vesicular stomatitis virus | 6010  | 0.947 | 1 | 0 | 1000 | 0.307 | 100 | 0.219 | [86] |
| Vesicular stomatitis virus | 6676  | 0.000 | 1 | 1 | 1000 | 1.000 | 100 | 1.000 | [86] |
| Vesicular stomatitis virus | 6907  | 0.000 | 1 | 1 | 1000 | 1.000 | 100 | 1.000 | [86] |
| Vesicular stomatitis virus | 7123  | 0.947 | 1 | 0 | 1000 | 0.305 | 100 | 0.217 | [86] |
| Vesicular stomatitis virus | 7128  | 0.635 | 1 | 0 | 1000 | 0.920 | 100 | 0.822 | [86] |
| Vesicular stomatitis virus | 7287  | 0.681 | 1 | 0 | 1000 | 0.890 | 100 | 0.778 | [86] |
| Vesicular stomatitis virus | 7739  | 0.956 | 1 | 0 | 1000 | 0.262 | 100 | 0.185 | [86] |
| Vesicular stomatitis virus | 7918  | 0.967 | 1 | 0 | 1000 | 0.204 | 100 | 0.142 | [86] |
| Vesicular stomatitis virus | 8188  | 0.000 | 1 | 1 | 1000 | 1.000 | 100 | 1.000 | [86] |
| Vesicular stomatitis virus | 8374  | 0.000 | 1 | 1 | 1000 | 1.000 | 100 | 1.000 | [86] |
| Vesicular stomatitis virus | 8426  | 0.000 | 1 | 1 | 1000 | 1.000 | 100 | 1.000 | [86] |
| Vesicular stomatitis virus | 8459  | 0.880 | 1 | 0 | 1000 | 0.565 | 100 | 0.430 | [86] |
| Vesicular stomatitis virus | 8787  | 0.937 | 1 | 0 | 1000 | 0.351 | 100 | 0.253 | [86] |
| Vesicular stomatitis virus | 9315  | 0.000 | 1 | 1 | 1000 | 1.000 | 100 | 1.000 | [86] |
| Vesicular stomatitis virus | 9535  | 0.000 | 1 | 1 | 1000 | 1.000 | 100 | 1.000 | [86] |
| Vesicular stomatitis virus | 10595 | 0.000 | 1 | 1 | 1000 | 1.000 | 100 | 1.000 | [86] |
| Vesicular stomatitis virus | 10941 | 0.000 | 1 | 1 | 1000 | 1.000 | 100 | 1.000 | [86] |
| Tobacco etch virus         | 158   | 0.916 | 1 | 0 | 6    | 0.167 | 3   | 0.132 | [87] |
| Tobacco etch virus         | 337   | 0.587 | 1 | 0 | 6    | 0.627 | 3   | 0.547 | [87] |
| Tobacco etch virus         | 375   | 0.659 | 1 | 0 | 6    | 0.548 | 3   | 0.468 | [87] |
| Tobacco etch virus         | 475   | 0.928 | 1 | 0 | 6    | 0.146 | 3   | 0.114 | [87] |
| Tobacco etch virus         | 872   | 0.972 | 1 | 0 | 6    | 0.059 | 3   | 0.045 | [87] |
| Tobacco etch virus         | 1503  | 1.346 | 0 | 0 | 6    |       | 3   |       | [87] |



|                    |      |       |   |   |   |       |   |       |      |
|--------------------|------|-------|---|---|---|-------|---|-------|------|
| Tobacco etch virus | 1569 | 0.585 | 1 | 0 | 6 | 0.630 | 3 | 0.549 | [87] |
| Tobacco etch virus | 1655 | 0.742 | 1 | 0 | 6 | 0.444 | 3 | 0.370 | [87] |
| Tobacco etch virus | 1758 | 0.000 | 1 | 1 | 6 | 1.000 | 3 | 1.000 | [87] |
| Tobacco etch virus | 1851 | 0.828 | 1 | 0 | 6 | 0.319 | 3 | 0.259 | [87] |
| Tobacco etch virus | 2119 | 0.759 | 1 | 0 | 6 | 0.420 | 3 | 0.348 | [87] |
| Tobacco etch virus | 2171 | 0.000 | 1 | 1 | 6 | 1.000 | 3 | 1.000 | [87] |
| Tobacco etch virus | 2216 | 0.000 | 1 | 1 | 6 | 1.000 | 3 | 1.000 | [87] |
| Tobacco etch virus | 2317 | 0.000 | 1 | 1 | 6 | 1.000 | 3 | 1.000 | [87] |
| Tobacco etch virus | 2412 | 0.000 | 1 | 1 | 6 | 1.000 | 3 | 1.000 | [87] |
| Tobacco etch virus | 2572 | 0.000 | 1 | 1 | 6 | 1.000 | 3 | 1.000 | [87] |
| Tobacco etch virus | 2750 | 0.000 | 1 | 1 | 6 | 1.000 | 3 | 1.000 | [87] |
| Tobacco etch virus | 2967 | 0.000 | 1 | 1 | 6 | 1.000 | 3 | 1.000 | [87] |
| Tobacco etch virus | 2977 | 1.264 | 0 | 0 | 6 |       | 3 |       | [87] |
| Tobacco etch virus | 3154 | 0.000 | 1 | 1 | 6 | 1.000 | 3 | 1.000 | [87] |
| Tobacco etch virus | 3179 | 0.000 | 1 | 1 | 6 | 1.000 | 3 | 1.000 | [87] |
| Tobacco etch virus | 3238 | 0.905 | 1 | 0 | 6 | 0.188 | 3 | 0.149 | [87] |
| Tobacco etch virus | 3406 | 0.973 | 1 | 0 | 6 | 0.057 | 3 | 0.044 | [87] |
| Tobacco etch virus | 3462 | 0.000 | 1 | 1 | 6 | 1.000 | 3 | 1.000 | [87] |
| Tobacco etch virus | 3468 | 0.800 | 1 | 0 | 6 | 0.362 | 3 | 0.297 | [87] |
| Tobacco etch virus | 3900 | 1.114 | 0 | 0 | 6 |       | 3 |       | [87] |
| Tobacco etch virus | 4101 | 1.235 | 0 | 0 | 6 |       | 3 |       | [87] |
| Tobacco etch virus | 4418 | 0.931 | 1 | 0 | 6 | 0.139 | 3 | 0.109 | [87] |
| Tobacco etch virus | 4510 | 0.000 | 1 | 1 | 6 | 1.000 | 3 | 1.000 | [87] |
| Tobacco etch virus | 4570 | 0.715 | 1 | 0 | 6 | 0.479 | 3 | 0.403 | [87] |
| Tobacco etch virus | 4828 | 0.000 | 1 | 1 | 6 | 1.000 | 3 | 1.000 | [87] |
| Tobacco etch virus | 5038 | 0.000 | 1 | 1 | 6 | 1.000 | 3 | 1.000 | [87] |
| Tobacco etch virus | 5115 | 0.561 | 1 | 0 | 6 | 0.653 | 3 | 0.574 | [87] |
| Tobacco etch virus | 5254 | 0.000 | 1 | 1 | 6 | 1.000 | 3 | 1.000 | [87] |
| Tobacco etch virus | 5279 | 0.000 | 1 | 1 | 6 | 1.000 | 3 | 1.000 | [87] |
| Tobacco etch virus | 5336 | 0.000 | 1 | 1 | 6 | 1.000 | 3 | 1.000 | [87] |
| Tobacco etch virus | 5344 | 0.900 | 1 | 0 | 6 | 0.198 | 3 | 0.157 | [87] |
| Tobacco etch virus | 5349 | 0.970 | 1 | 0 | 6 | 0.063 | 3 | 0.048 | [87] |
| Tobacco etch virus | 5351 | 0.803 | 1 | 0 | 6 | 0.357 | 3 | 0.292 | [87] |
| Tobacco etch virus | 5387 | 0.872 | 1 | 0 | 6 | 0.246 | 3 | 0.196 | [87] |
| Tobacco etch virus | 5582 | 0.964 | 1 | 0 | 6 | 0.074 | 3 | 0.058 | [87] |
| Tobacco etch virus | 5793 | 0.610 | 1 | 0 | 6 | 0.603 | 3 | 0.523 | [87] |
| Tobacco etch virus | 5908 | 0.000 | 1 | 1 | 6 | 1.000 | 3 | 1.000 | [87] |
| Tobacco etch virus | 5924 | 0.000 | 1 | 1 | 6 | 1.000 | 3 | 1.000 | [87] |
| Tobacco etch virus | 6012 | 0.924 | 1 | 0 | 6 | 0.152 | 3 | 0.120 | [87] |
| Tobacco etch virus | 6044 | 0.963 | 1 | 0 | 6 | 0.077 | 3 | 0.060 | [87] |
| Tobacco etch virus | 6197 | 1.229 | 0 | 0 | 6 |       | 3 |       | [87] |
| Tobacco etch virus | 6251 | 0.708 | 1 | 0 | 6 | 0.488 | 3 | 0.411 | [87] |
| Tobacco etch virus | 6409 | 0.942 | 1 | 0 | 6 | 0.119 | 3 | 0.093 | [87] |
| Tobacco etch virus | 6418 | 0.000 | 1 | 1 | 6 | 1.000 | 3 | 1.000 | [87] |
| Tobacco etch virus | 6519 | 1.025 | 0 | 0 | 6 |       | 3 |       | [87] |
| Tobacco etch virus | 6660 | 0.930 | 1 | 0 | 6 | 0.141 | 3 | 0.111 | [87] |
| Tobacco etch virus | 6890 | 0.000 | 1 | 1 | 6 | 1.000 | 3 | 1.000 | [87] |
| Tobacco etch virus | 6988 | 0.753 | 1 | 0 | 6 | 0.429 | 3 | 0.356 | [87] |
| Tobacco etch virus | 7034 | 0.000 | 1 | 1 | 6 | 1.000 | 3 | 1.000 | [87] |
| Tobacco etch virus | 7182 | 1.158 | 0 | 0 | 6 |       | 3 |       | [87] |

|                    |      |       |   |   |   |       |   |       |      |
|--------------------|------|-------|---|---|---|-------|---|-------|------|
| Tobacco etch virus | 7315 | 0.918 | 1 | 0 | 6 | 0.163 | 3 | 0.129 | [87] |
| Tobacco etch virus | 7582 | 0.000 | 1 | 1 | 6 | 1.000 | 3 | 1.000 | [87] |
| Tobacco etch virus | 7643 | 0.000 | 1 | 1 | 6 | 1.000 | 3 | 1.000 | [87] |
| Tobacco etch virus | 8026 | 0.000 | 1 | 1 | 6 | 1.000 | 3 | 1.000 | [87] |
| Tobacco etch virus | 8359 | 1.141 | 0 | 0 | 6 |       | 3 |       | [87] |
| Tobacco etch virus | 8398 | 0.812 | 1 | 0 | 6 | 0.344 | 3 | 0.280 | [87] |
| Tobacco etch virus | 8501 | 0.000 | 1 | 1 | 6 | 1.000 | 3 | 1.000 | [87] |
| Tobacco etch virus | 8988 | 0.589 | 1 | 0 | 6 | 0.625 | 3 | 0.545 | [87] |
| Tobacco etch virus | 9256 | 0.605 | 1 | 0 | 6 | 0.608 | 3 | 0.528 | [87] |
| Tobacco etch virus | 9466 | 0.000 | 1 | 1 | 6 | 1.000 | 3 | 1.000 | [87] |

\*For bacteriophage Q $\beta$  and vesicular stomatitis virus, fitness was determined as the mutant to wild-type growth rate ratio,  $q$ . For tobacco etch virus, a different unit was originally used, but data were converted to growth rate ratios as detailed in previous work (88).

†Per-cell burst sizes. Since these are uncertain, lower- and upper-limits based were used (88).

‡Selection coefficient per cell infection, calculated as  $s = 1 - (B^q - 1)/(B - 1)$ .  $s$  (lower) and  $s$  (upper) refer to  $s$  calculated using lower and upper limit  $B$  values, respectively.  $s > 0$  means that the mutation is deleterious;  $s = 1$  means that the mutation is lethal;  $s$  is not shown for beneficial mutations. Values given in the main text correspond to the harmonic mean of all deleterious selection coefficients, pooling the three datasets. This calculation was done including or excluding lethal mutations, as well as using upper- or lower-limit  $B$  values, hence defining the intervals indicated in the main text.

## Supplementary References

1. Song J, Shen D, Cui J, Zhao B (2010) Accelerated evolution of PRRSV during recent outbreaks in China. *Virus Genes* 41: 241-245.
2. Bok K et al. (2009) Evolutionary dynamics of GII.4 noroviruses over a 34-year period. *J Virol* 83: 11890-11901.
3. Boon D et al. (2011) Comparative evolution of GII.3 and GII.4 norovirus over a 31-year period. *J Virol* 85: 8656-8666.
4. Kerr PJ, Kitchen A, Holmes EC (2009) Origin and phylodynamics of rabbit hemorrhagic disease virus. *J Virol* 83: 12129-12138.
5. McKinley ET et al. (2011) Attenuated live vaccine usage affects accurate measures of virus diversity and mutation rates in avian coronavirus infectious bronchitis virus. *Virus Res* 158: 225-234.
6. Vijgen L et al. (2005) Complete genomic sequence of human coronavirus OC43: molecular clock analysis suggests a relatively recent zoonotic coronavirus transmission event. *J Virol* 79: 1595-1604.
7. Pyrc K et al. (2006) Mosaic structure of human coronavirus NL63, one thousand years of evolution. *J Mol Biol* 364: 964-973.
8. Hon CC et al. (2008) Evidence of the recombinant origin of a bat severe acute respiratory syndrome (SARS)-like coronavirus and its implications on the direct ancestor of SARS coronavirus. *J Virol* 82: 1819-1826.
9. Lau SK et al. (2010) Ecoepidemiology and complete genome comparison of different strains of severe acute respiratory syndrome-related Rhinolophus bat coronavirus in China reveal bats as a reservoir for acute, self-limiting infection that allows recombination events. *J Virol* 84: 2808-2819.
10. Wertheim JO, Tang KF, Navarro SA, Lightner DV (2009) A quick fuse and the emergence of Taura syndrome virus. *Virology* 390: 324-329.
11. Patil JA et al. (2011) Evolutionary dynamics of the American African genotype of dengue type 1 virus in India (1962-2005). *Infect Genet Evol* 11: 1443-1448.

12. Klungthong C, Zhang C, Mammen MP, Jr., Ubol S, Holmes EC (2004) The molecular epidemiology of dengue virus serotype 4 in Bangkok, Thailand. *Virology* 329: 168-179.
13. Kumar SR et al. (2010) Evolution, dispersal and replacement of American genotype dengue type 2 viruses in India (1956-2005): selection pressure and molecular clock analyses. *J Gen Virol* 91: 707-720.
14. Ramirez A et al. (2010) Evolution of dengue virus type 3 genotype III in Venezuela: diversification, rates and population dynamics. *Virol J* 7: 329.
15. Romano CM, Zanotto PM, Holmes EC (2008) Bayesian coalescent analysis reveals a high rate of molecular evolution in GB virus C. *J Mol Evol* 66: 292-297.
16. Gray RR et al. (2011) The mode and tempo of hepatitis C virus evolution within and among hosts. *BMC Evol Biol* 11: 131-11.
17. Magiorkinis G et al. (2009) The global spread of hepatitis C virus 1a and 1b: a phylodynamic and phylogeographic analysis. *PLoS Med* 6: e1000198.
18. Mohammed MA et al. (2011) Molecular phylogenetic and evolutionary analyses of Muar strain of Japanese encephalitis virus reveal it is the missing fifth genotype. *Infect Genet Evol* 11: 855-862.
19. Mehla R et al. (2009) Recent ancestry of Kyasanur Forest disease virus. *Emerg Infect Dis* 15: 1431-1437.
20. Baillie GJ et al. (2008) Phylogenetic and evolutionary analyses of St. Louis encephalitis virus genomes. *Mol Phylogenet Evol* 47: 717-728.
21. Auguste AJ, Pybus OG, Carrington CV (2009) Evolution and dispersal of St. Louis encephalitis virus in the Americas. *Infect Genet Evol* 9: 709-715.
22. Bertolotti L, Kitron U, Goldberg TL (2007) Diversity and evolution of West Nile virus in Illinois and the United States, 2002-2005. *Virology* 360: 143-149.
23. Pagan I, Holmes EC (2010) Long-term evolution of the Luteoviridae: time scale and mode of virus speciation. *J Virol* 84: 6177-6187.
24. Wu B et al. (2011) Dynamics of molecular evolution and phylogeography of Barley yellow dwarf virus-PAV. *PLoS ONE* 6: e16896.
25. Hicks AL, Duffy S (2011) Genus-specific substitution rate variability among picornaviruses. *J Virol* 85: 7942-7947.
26. Yoon SH, Park W, King DP, Kim H (2011) Phylogenomics and molecular evolution of foot-and-mouth disease virus. *Mol Cells* 31: 413-421.
27. Moratorio G et al. (2007) Bayesian coalescent inference of hepatitis A virus populations: evolutionary rates and patterns. *J Gen Virol* 88: 3039-3042.
28. Kulkarni MA, Walimbe AM, Cherian S, Arankalle VA (2009) Full length genomes of genotype IIIA Hepatitis A Virus strains (1995-2008) from India and estimates of the evolutionary rates and ages. *Infect Genet Evol* 9: 1287-1294.
29. Chu PY et al. (2011) Spatiotemporal phylogenetic analysis and molecular characterization of coxsackievirus A4. *Infect Genet Evol* 11: 1426-1435.
30. Mirand A et al. (2010) Phylogenetic evidence for a recent spread of two populations of human enterovirus 71 in European countries. *J Gen Virol* 91: 2263-2277.
31. McWilliam Leitch EC et al. (2009) Transmission networks and population turnover of echovirus 30. *J Virol* 83: 2109-2118.
32. Gullberg M et al. (2010) Characterization of a putative ancestor of coxsackievirus B5. *J Virol* 84: 9695-9708.
33. Faria NR, de Vries M, van Hemert FJ, Benschop K, van der HL (2009) Rooting human parechovirus evolution in time. *BMC Evol Biol* 9: 164.
34. Jorba J, Campagnoli R, De L, Kew O (2008) Calibration of multiple poliovirus molecular clocks covering an extended evolutionary range. *J Virol* 82: 4429-4440.
35. Simmons HE, Holmes EC, Stephenson AG (2008) Rapid evolutionary dynamics of zucchini yellow mosaic virus. *J Gen Virol* 89: 1081-1085.

36. Padhi A et al. (2008) Phylogeographical structure and evolutionary history of two Buggy Creek virus lineages in the western Great Plains of North America. *J Gen Virol* 89: 2122-2131.
37. Jones A, Lowry K, Aaskov J, Holmes EC, Kitchen A (2010) Molecular evolutionary dynamics of Ross River virus and implications for vaccine efficacy. *J Gen Virol* 91: 182-188.
38. Auguste AJ et al. (2009) Isolation and phylogenetic analysis of Mucambo virus (Venezuelan equine encephalitis complex subtype IIIA) in Trinidad. *Virology* 392: 123-130.
39. Pagan I, Firth C, Holmes EC (2010) Phylogenetic analysis reveals rapid evolutionary dynamics in the plant RNA virus genus tobamovirus. *J Mol Evol* 71: 298-307.
40. Fargette D et al. (2008) Rice yellow mottle virus, an RNA plant virus, evolves as rapidly as most RNA animal viruses. *J Virol* 82: 3584-3589.
41. Carroll SA, Bird BH, Rollin PE, Nichol ST (2010) Ancient common ancestry of Crimean-Congo hemorrhagic fever virus. *Mol Phylogenet Evol* 55: 1103-1110.
42. Ramsden C, Holmes EC, Charleston MA (2009) Hantavirus evolution in relation to its rodent and insectivore hosts: no evidence for codivergence. *Mol Biol Evol* 26: 143-153.
43. Bird BH, Khristova ML, Rollin PE, Ksiazek TG, Nichol ST (2007) Complete genome analysis of 33 ecologically and biologically diverse Rift Valley fever virus strains reveals widespread virus movement and low genetic diversity due to recent common ancestry. *J Virol* 81: 2805-2816.
44. Black WC, Doty JB, Hughes MT, Beaty BJ, Calisher CH (2009) Temporal and geographic evidence for evolution of Sin Nombre virus using molecular analyses of viral RNA from Colorado, New Mexico and Montana. *Virol J* 6: 102.
45. Chen R, Holmes EC (2006) Avian influenza virus exhibits rapid evolutionary dynamics. *Mol Biol Evol* 23: 2336-2341.
46. Fourment M, Wood JT, Gibbs AJ, Gibbs MJ (2010) Evolutionary dynamics of the N1 neuraminidases of the main lineages of influenza A viruses. *Mol Phylogenet Evol* 56: 526-535.
47. Goni N, Fajardo A, Moratorio G, Colina R, Cristina J (2009) Modeling gene sequences over time in 2009 H1N1 influenza A virus populations. *Virol J* 6: 215.
48. Xu J, Christman MC, Donis RO, Lu G (2011) Evolutionary dynamics of influenza A nucleoprotein (NP) lineages revealed by large-scale sequence analyses. *Infect Genet Evol*, in press.
49. Padhi A, Poss M (2009) Population dynamics and rates of molecular evolution of a recently emerged paramyxovirus, avian metapneumovirus subtype C. *J Virol* 83: 2015-2019.
50. Pomeroy LW, Bjornstad ON, Holmes EC (2008) The evolutionary and epidemiological dynamics of the paramyxoviridae. *J Mol Evol* 66: 98-106.
51. Yang CF et al. (2009) Genetic diversity and evolution of human metapneumovirus fusion protein over twenty years. *Virol J* 6: 138.
52. Furuse Y, Suzuki A, Oshitani H (2010) Origin of measles virus: divergence from rinderpest virus between the 11th and 12th centuries. *Virol J* 7: 52.
53. van Niekerk S, Venter M (2011) Replacement of previously circulating respiratory syncytial virus subtype B strains with the BA genotype in South Africa. *J Virol* 85: 8789-8797.
54. Davis PL et al. (2005) Phylogeography, population dynamics, and molecular evolution of European bat lyssaviruses. *J Virol* 79: 10487-10497.
55. Davis PL, Bourhy H, Holmes EC (2006) The evolutionary history and dynamics of bat rabies virus. *Infect Genet Evol* 6: 464-473.
56. Hughes GJ, Orciari LA, Rupprecht CE (2005) Evolutionary timescale of rabies virus adaptation to North American bats inferred from the substitution rate of the nucleoprotein gene. *J Gen Virol* 86: 1467-1474.
57. David D et al. (2007) Identification of novel canine rabies virus clades in the Middle East and North Africa. *J Gen Virol* 88: 967-980.
58. Davis PL, Rambaut A, Bourhy H, Holmes EC (2007) The evolutionary dynamics of canid and mongoose rabies virus in Southern Africa. *Arch Virol* 152: 1251-1258.

59. Meng S et al. (2010) Transmission dynamics of rabies in China over the last 40 years: 1969-2009. *J Clin Virol* 49: 47-52.
60. Ming P et al. (2010) A history estimate and evolutionary analysis of rabies virus variants in China. *J Gen Virol* 91: 759-764.
61. Hon CC et al. (2006) Phylogenetic analysis reveals a correlation between the expansion of very virulent infectious bursal disease virus and reassortment of its genome segment B. *J Virol* 80: 8503-8509.
62. Carpi G, Holmes EC, Kitchen A (2010) The evolutionary dynamics of bluetongue virus. *J Mol Evol* 70: 583-592.
63. Stenger DC, Sisterson MS, French R (2010) Population genetics of *Homalodisca vitripennis* reovirus validates timing and limited introduction to California of its invasive insect host, the glassy-winged sharpshooter. *Virology* 407: 53-59.
64. Matthijnssens J et al. (2010) Phylodynamic analyses of rotavirus genotypes G9 and G12 underscore their potential for swift global spread. *Mol Biol Evol* 27: 2431-2436.
65. Lu Z et al. (2011) Liao ning virus in China. *Virology* 418: 282.
66. Zhou Y, Holmes EC (2007) Bayesian estimates of the evolutionary rate and age of hepatitis B virus. *J Mol Evol* 65: 197-205.
67. Harrison A et al. (2011) Genomic analysis of hepatitis B virus reveals antigen state and genotype as sources of evolutionary rate variation. *Viruses* 3: 83-101.
68. Bello G et al. (2010) Phylodynamics of HIV-1 circulating recombinant forms 12\_BF and 38\_BF in Argentina and Uruguay. *Retrovirology* 7: 22.
69. Dalai SC et al. (2009) Evolution and molecular epidemiology of subtype C HIV-1 in Zimbabwe. *AIDS* 23: 2523-2532.
70. Lemey P, Van Dooren S, Vandamme AM (2005) Evolutionary dynamics of human retroviruses investigated through full-genome scanning. *Mol Biol Evol* 22: 942-951.
71. Aulicino PC, Holmes EC, Rocco C, Mangano A, Sen L (2007) Extremely rapid spread of human immunodeficiency virus type 1 BF recombinants in Argentina. *J Virol* 81: 427-429.
72. Firth C, Charleston MA, Duffy S, Shapiro B, Holmes EC (2009) Insights into the evolutionary history of an emerging livestock pathogen: porcine circovirus 2. *J Virol* 83: 12813-12821.
73. Duffy S, Holmes EC (2009) Validation of high rates of nucleotide substitution in geminiviruses: phylogenetic evidence from East African cassava mosaic viruses. *J Gen Virol* 90: 1539-1547.
74. Lefeuvre P et al. (2011) Evolutionary time-scale of the begomoviruses: evidence from integrated sequences in the *Nicotiana* genome. *PLoS ONE* 6: e19193.
75. Duffy S, Holmes EC (2008) Phylogenetic evidence for rapid rates of molecular evolution in the single-stranded DNA begomovirus tomato yellow leaf curl virus. *J Virol* 82: 957-965.
76. Almeida RP, Bennett GM, Anhalt MD, Tsai CW, O'Grady P (2009) Spread of an introduced vector-borne banana virus in Hawaii. *Mol Ecol* 18: 136-146.
77. Shackelton LA, Parrish CR, Truyen U, Holmes EC (2005) High rate of viral evolution associated with the emergence of carnivore parvovirus. *Proc Natl Acad Sci U S A* 102: 379-384.
78. Shackelton LA, Holmes EC (2006) Phylogenetic evidence for the rapid evolution of human B19 erythrovirus. *J Virol* 80: 3666-3669.
79. Parsyan A, Szmargd C, Allain JP, Candotti D (2007) Identification and genetic diversity of two human parvovirus B19 genotype 3 subtypes. *J Gen Virol* 88: 428-431.
80. Robles-Sikisaka R, Bohonak AJ, McClenaghan LR, Jr., Dhar AK (2010) Genetic signature of rapid IHNV (infectious hypodermal and hematopoietic necrosis virus) expansion in wild *Penaeus* shrimp populations. *PLoS ONE* 5: e11799.
81. Streck AF et al. (2011) High rate of viral evolution in the capsid protein of porcine parvovirus. *J Gen Virol*.

82. Firth C et al. (2010) using time-structured data to estimate evolutionary rates of double-stranded DNA viruses. *Mol Biol Evol* 27: 2038-2051.
83. Shackelton LA, Rambaut A, Pybus OG, Holmes EC (2006) JC virus evolution and its association with human populations. *J Virol* 80: 9928-9933.
84. Babkin IV, Babkina IN (2011) Molecular dating in the evolution of vertebrate poxviruses. *Intervirology* 54: 253-260.
85. Carrasco P, de la Iglesia F, Elena SF (2007) Distribution of fitness and virulence effects caused by single-nucleotide substitutions in Tobacco Etch virus. *J Virol* 81: 12979-12984.
86. Domingo-Calap P, Cuevas JM, Sanjuán R (2009) The fitness effects of random mutations in single-stranded DNA and RNA bacteriophages. *PLoS Genet* 5: e1000742.
87. Sanjuán R, Moya A, Elena SF (2004) The distribution of fitness effects caused by single-nucleotide substitutions in an RNA virus. *Proc Natl Acad Sci USA* 101: 8396-8401.
88. Sanjuán R (2010) Mutational fitness effects in RNA and ssDNA viruses: common patterns revealed by site-directed mutagenesis studies. *Phil Trans R Soc Lond* 365: 1975-1982.
